# Supplementary material
Source: MDPI journal article supplement (https://www.mdpi.com/1424-2818/12/1/38)
Supplement: s1 [file s1]

# Supplementary Material

Supplementary Table S1: Species list of phytoplankton taxa per sampling site during the study period.

|                                            | Lafra | Lafrouda | Lagos | Palaia Koiti | Vis1 | Vis2 | Vis3 |
|--------------------------------------------|-------|----------|-------|--------------|------|------|------|
| <b>Cyanobacteria</b>                       |       |          |       |              |      |      |      |
| <i>Aphanizomenon favaloroi</i>             |       | *        | *     |              | *    | *    | *    |
| Black filaments                            | *     | *        | *     |              | *    | *    | *    |
| Cocoid cyanobacteria (big)                 | *     | *        | *     | *            | *    | *    | *    |
| Cocoid cyanobacteria (small)               | *     | *        | *     | *            | *    | *    | *    |
| <i>Dolichospermum flos-aquae</i>           |       |          |       |              | *    |      | *    |
| <i>Limnothrix/Jaaginema</i> sp.            | *     | *        | *     | *            | *    | *    | *    |
| <i>Planktolyngbya limnetica</i>            |       | *        | *     |              | *    | *    | *    |
| <i>Pseudanabaena</i> sp.                   | *     | *        | *     | *            | *    | *    | *    |
| <b>Bacillariophyceae</b>                   |       |          |       |              |      |      |      |
| <i>Chaetoceros danicus</i>                 |       |          |       |              |      |      | *    |
| <i>Chaetoceros peruvianus</i>              | *     | *        |       | *            |      |      | *    |
| <i>Chaetoceros</i> sp.                     | *     | *        | *     | *            | *    | *    | *    |
| <i>Chaetoceros tenuisimus</i>              | *     | *        | *     | *            | *    | *    | *    |
| <i>Chaetoceros throdensis</i>              | *     | *        | *     | *            | *    | *    | *    |
| <i>Cyclostephanos</i> sp.                  | *     | *        | *     | *            | *    | *    | *    |
| <i>Cylindrotheca closterium</i>            | *     | *        | *     | *            | *    | *    | *    |
| <i>Dactyliosolen blavyannus</i>            | *     | *        |       | *            |      | *    |      |
| <i>Dactyliosolen fragilissimus</i>         | *     | *        |       | *            |      |      | *    |
| <i>Ditylum breightweilli</i>               |       |          |       | *            |      |      |      |
| <i>Guinnardia delicatula</i>               |       | *        | *     | *            |      | *    | *    |
| <i>Hemiaulus hauckii</i>                   | *     | *        |       | *            |      | *    | *    |
| <i>Leptocylindros danicus</i>              | *     | *        |       | *            | *    | *    |      |
| <i>Leptocylindros minimus</i>              |       | *        |       | *            |      |      |      |
| <i>Melosira</i> sp.                        |       |          | *     | *            |      |      |      |
| <i>Meuniera membranacea</i>                |       |          |       | *            |      |      |      |
| <i>Nitzschia frigida</i>                   | *     | *        | *     | *            | *    | *    | *    |
| <i>Nitzschia longissima</i>                | *     | *        | *     | *            | *    | *    | *    |
| <i>Navicula transitans</i>                 | *     | *        | *     | *            | *    | *    |      |
| <i>Odontella aurita</i>                    |       |          |       | *            |      |      |      |
| <i>Proboscia alata</i>                     | *     | *        | *     | *            |      | *    | *    |
| <i>Pseudonitzschia pseudodelicatissima</i> | *     | *        |       | *            |      |      | *    |
| <i>Pseudonitzschia pungens</i>             | *     |          |       | *            |      | *    | *    |
| <i>Rhizosolenia impricata</i>              |       |          |       | *            | *    | *    |      |
| <i>Rhizosolenia setigera</i>               | *     | *        | *     | *            | *    | *    | *    |
| <i>Striatella unipuncta</i>                |       |          | *     | *            |      |      |      |
| <i>Skeletonema</i> cf. <i>costatum</i>     | *     | *        | *     | *            |      | *    | *    |
| <i>Synedra</i> sp.                         |       |          |       |              |      |      |      |
| <i>Thalassionema nitzschioides</i>         | *     | *        | *     | *            | *    |      | *    |
| <i>Thalassiosira</i> sp.                   |       | *        | *     | *            |      |      | *    |
| Unidentified centric diatom                |       |          |       |              | *    | *    |      |
| <b>Dinophyceae</b>                         |       |          |       |              |      |      |      |
| <i>Alexandrium</i> sp.                     | *     | *        | *     | *            | *    | *    | *    |
| <i>Ceratium fusus</i>                      |       | *        | *     |              |      |      |      |
| <i>Dinophysis acuminata</i>                |       |          | *     | *            | *    | *    | *    |
| <i>Fragilidium</i> sp.                     |       |          | *     |              |      | *    |      |
| <i>Gonyaulax fragilis</i>                  | *     | *        |       | *            |      |      | *    |

|                                |   |   |   |   |   |   |   |
|--------------------------------|---|---|---|---|---|---|---|
| <i>Gonyaulax verior</i>        | * | * | * | * | * | * | * |
| <i>Gymnodinium</i> sp.1        | * | * | * | * | * |   | * |
| <i>Gymnodinium</i> sp.2        | * | * | * | * | * | * | * |
| <i>Heterocapsa triquerta</i>   | * |   | * | * |   |   |   |
| <i>Heterocapsa rotundata</i>   | * |   |   | * |   |   |   |
| <i>Karenia</i> sp.             |   |   | * |   |   |   | * |
| <i>Karlodinium</i> sp.         |   |   | * |   |   |   |   |
| <i>Katodinium glaucum</i>      | * | * | * | * | * | * | * |
| <i>Prorocentrum lima</i>       | * |   | * | * |   |   | * |
| <i>Prorocentrum micans</i>     | * | * | * | * | * | * | * |
| <i>Prorocentrum minimum</i>    | * | * | * | * | * | * | * |
| <i>Scropsiella trochoidea</i>  | * | * | * | * | * |   | * |
| <b>Chlorophyceae</b>           |   |   |   |   |   |   |   |
| <i>Chlamydomonas</i> sp.       |   |   | * |   | * | * | * |
| <i>Crucigeniella</i> sp.       |   |   |   |   | * |   | * |
| <i>Dunaliella salina</i>       | * |   |   |   |   |   | * |
| <i>Kirchineriella</i> sp.      | * | * | * | * | * | * | * |
| <i>Monoraphidium arcuatum</i>  | * |   | * |   | * | * | * |
| <i>Monoraphidium contortum</i> | * | * | * |   | * | * | * |
| <i>Monoraphidium minutum</i>   |   |   |   |   | * |   |   |
| <i>Oocystis</i> sp.            |   |   |   |   | * |   |   |
| <i>Scenedesmus</i> sp.         |   |   |   |   |   | * |   |
| <i>Tetraedron minimum</i>      |   |   |   |   | * |   | * |
| <b>Cryptophyceae</b>           |   |   |   |   |   |   |   |
| <i>Cryptomonas</i> sp.         | * | * | * | * | * | * | * |
| <i>Plagioselmis</i> sp.        | * | * | * | * | * | * | * |
| <i>Rhodomonas</i> sp.          | * |   |   | * |   | * | * |
| <i>Teleaulax acuta</i>         | * | * | * | * | * | * | * |
| <b>Haptophyceae</b>            |   |   |   |   |   |   |   |
| <i>Chrysochromulina</i> sp.    | * | * | * | * | * | * | * |
| <i>Imantonia rotunda</i>       | * | * | * | * | * | * | * |
| <b>Prymnesiophyceae</b>        |   |   |   |   |   |   |   |
| <i>Coccolithales</i>           |   |   | * | * |   |   |   |
| <b>Prasinophyceae</b>          |   |   |   |   |   |   |   |
| <i>Pyraminomonas aureus</i>    | * | * | * |   | * | * |   |
| <i>Tetraselmis</i> sp.         | * | * | * | * | * | * | * |
| <b>Euglenophyceae</b>          |   |   |   |   |   |   |   |
| <i>Eutreptiella</i> sp.        | * | * | * | * | * | * | * |
| <b>Raphidophyceae</b>          |   |   |   |   |   |   |   |
| <i>Heterosigma</i> sp.         |   |   | * |   |   |   |   |

---

**Supplementary Table S2: Species number, total phytoplankton biomass and alpha diversity indices per sample.**

| <b>Sampling code</b> | <b>Species<br/>number (S)</b> | <b>Biomass<br/>(mg L<sup>-1</sup>)</b> | <b>Shannon<br/>(H)</b> | <b>Eveness<br/>(e<sup>H/S</sup>)</b> |
|----------------------|-------------------------------|----------------------------------------|------------------------|--------------------------------------|
| Lafra_Nov 2018       | 13                            | 12.00                                  | 0.22                   | 0.10                                 |
| Lafrouda_Nov 2018    | 9                             | 1.89                                   | 0.54                   | 0.19                                 |
| Lag_Nov 2018         | 8                             | 3.38                                   | 1.08                   | 0.37                                 |
| PK_Nov 2018          | 13                            | 7.49                                   | 2.22                   | 0.71                                 |
| Vis1_Nov 2018        | 15                            | 8.15                                   | 1.96                   | 0.47                                 |
| Vis2_Nov 2018        | 15                            | 10.92                                  | 2.16                   | 0.58                                 |
| Vis3_Nov 2018        | 16                            | 15.12                                  | 1.33                   | 0.24                                 |
| Lafra_Dec 2018       | 12                            | 7.02                                   | 0.56                   | 0.15                                 |
| Lafrouda_Dec 2018    | 7                             | 0.17                                   | 1.03                   | 0.40                                 |
| Lag_Dec 2018         | 13                            | 2.38                                   | 1.62                   | 0.39                                 |
| PK_Dec 2018          | 11                            | 0.67                                   | 1.89                   | 0.60                                 |
| Vis1_Dec 2018        | 11                            | 51.32                                  | 0.92                   | 0.23                                 |
| Vis2_Dec 2018        | 9                             | 40.25                                  | 0.97                   | 0.29                                 |
| Vis3_Dec 2018        | 10                            | 36.87                                  | 0.98                   | 0.27                                 |
| Lafrouda_Jan 2019    | 11                            | 1.83                                   | 1.42                   | 0.38                                 |
| Lag_Jan 2019         | 10                            | 3.95                                   | 1.32                   | 0.37                                 |
| PK_Jan 2019          | 16                            | 0.63                                   | 1.77                   | 0.37                                 |
| Vis1_Jan 2019        | 9                             | 4.36                                   | 1.55                   | 0.52                                 |
| Vis2_Jan 2019        | 9                             | 2.59                                   | 1.19                   | 0.36                                 |
| Vis3_Jan 2019        | 9                             | 6.14                                   | 1.45                   | 0.47                                 |
| Lag_Feb 2019         | 11                            | 1.53                                   | 1.50                   | 0.41                                 |
| PK_Feb 2019          | 14                            | 0.94                                   | 2.16                   | 0.62                                 |
| Vis2_Feb 2019        | 8                             | 29.05                                  | 0.77                   | 0.27                                 |
| Vis3_Feb 2019        | 13                            | 8.24                                   | 1.01                   | 0.21                                 |
| Lafra_Mar 2019       | 13                            | 0.86                                   | 2.04                   | 0.59                                 |
| Lafrouda_Mar 2019    | 16                            | 26.36                                  | 0.53                   | 0.11                                 |
| Lag_Mar 2019         | 21                            | 3.85                                   | 1.48                   | 0.21                                 |
| PK_Mar 2019          | 23                            | 2.30                                   | 1.01                   | 0.12                                 |
| Vis1_Mar 2019        | 9                             | 5.44                                   | 1.22                   | 0.38                                 |
| Vis2_Mar 2019        | 13                            | 6.34                                   | 1.36                   | 0.30                                 |
| Vis3_Mar 2019        | 20                            | 33.6                                   | 0.78                   | 0.11                                 |
| Lafra_Apr 2019       | 17                            | 4.41                                   | 1.67                   | 0.31                                 |
| Lafrouda_Apr 2019    | 14                            | 127.76                                 | 0.13                   | 0.08                                 |
| Lag_Apr 2019         | 23                            | 8.88                                   | 1.45                   | 0.19                                 |
| PK_Apr 2019          | 28                            | 1.72                                   | 2.06                   | 0.28                                 |
| Vis1_Apr 2019        | 11                            | 32.04                                  | 0.48                   | 0.15                                 |
| Vis2_Apr 2019        | 13                            | 20.20                                  | 0.52                   | 0.13                                 |
| Vis3_Apr 2019        | 15                            | 30.21                                  | 0.62                   | 0.12                                 |
| Lafra_May 2019       | 18                            | 15.37                                  | 1.33                   | 0.21                                 |
| Lafrouda_May 2019    | 19                            | 9.15                                   | 1.89                   | 0.35                                 |
| Lag_May 2019         | 26                            | 8.33                                   | 2.12                   | 0.32                                 |
| PK_May 2019          | 19                            | 3.25                                   | 2.17                   | 0.46                                 |
| Vis1_May 2019        | 19                            | 72.12                                  | 0.97                   | 0.14                                 |
| Vis2_May 2019        | 21                            | 8.80                                   | 1.43                   | 0.20                                 |
| Vis3_May 2019        | 23                            | 23.16                                  | 0.89                   | 0.11                                 |
| Lafra_Jun 2019       | 18                            | 12.04                                  | 1.64                   | 0.29                                 |
| Lafrouda_Jun 2019    | 21                            | 2.87                                   | 1.20                   | 0.16                                 |
| Lag_Jun 2019         | 29                            | 5.19                                   | 2.07                   | 0.27                                 |

|                   |    |        |      |      |
|-------------------|----|--------|------|------|
| PK_Jun 2019       | 23 | 5.63   | 0.80 | 0.10 |
| Vis1_Jun 2019     | 19 | 21.26  | 1.49 | 0.23 |
| Vis2_Jun 2019     | 17 | 19.61  | 1.70 | 0.32 |
| Vis3_Jun 2019     | 19 | 12.10  | 1.89 | 0.35 |
| Lafra_Jul 2019    | 24 | 39.03  | 1.56 | 0.20 |
| Lafrouda_Jul 2019 | 10 | 82.90  | 0.10 | 0.11 |
| Lag_Jul 2019      | 18 | 12.41  | 1.37 | 0.22 |
| PK_Jul 2019       | 27 | 8.41   | 1.25 | 0.13 |
| Vis1_Jul 2019     | 18 | 23.27  | 0.89 | 0.14 |
| Vis2_Jul 2019     | 23 | 20.05  | 1.64 | 0.22 |
| Vis3_Jul 2019     | 26 | 11.93  | 1.54 | 0.18 |
| Lafra_Aug 2019    | 16 | 26.79  | 0.90 | 0.15 |
| Lafrouda_Aug 2019 | 11 | 3.50   | 0.74 | 0.19 |
| Lag_Aug 2019      | 21 | 10.02  | 1.57 | 0.23 |
| PK_Aug 2019       | 20 | 2.03   | 1.13 | 0.15 |
| Vis1_Aug 2019     | 16 | 43.50  | 0.45 | 0.10 |
| Vis2_Aug 2019     | 21 | 33.02  | 0.88 | 0.11 |
| Vis3_Aug 2019     | 19 | 39.02  | 1.15 | 0.17 |
| Lafra_Sep 2019    | 19 | 2.98   | 1.92 | 0.36 |
| Lafrouda_Sep 2019 | 25 | 2.89   | 1.98 | 0.29 |
| Lag_Sep 2019      | 19 | 3.29   | 2.36 | 0.56 |
| PK_Sep 2019       | 23 | 0.73   | 2.25 | 0.41 |
| Vis1_Sep 2019     | 15 | 134.73 | 0.47 | 0.11 |
| Vis2_Sep 2019     | 15 | 7.93   | 0.99 | 0.18 |
| Vis3_Sep 2019     | 15 | 8.26   | 0.47 | 0.11 |
| Lafra_Oct 2019    | 16 | 2.68   | 1.48 | 0.27 |
| Lag_Oct 2019      | 17 | 5.10   | 1.30 | 0.22 |
| PK_Oct 2019       | 17 | 2.25   | 1.22 | 0.20 |
| Vis1_Oct 2019     | 20 | 37.24  | 1.10 | 0.15 |
| Vis2_Oct 2019     | 15 | 1.13   | 2.40 | 0.74 |
| Vis3_Oct 2019     | 18 | 3.27   | 1.91 | 0.38 |

**Supplementary Table S3: List of higher contributing phytoplankton species in communities' dissimilarity determined by SIMPER between site pairs.**

**a. Lafra - Vistonis lagoons; .**

| <b>Taxon</b>                 | <b>Average dissimilarity</b> | <b>Contribution (%)</b> | <b>Cumulative (%)</b> |
|------------------------------|------------------------------|-------------------------|-----------------------|
| <b>Lafra - Vis1</b>          |                              |                         |                       |
| <i>Prorocentrum minimum</i>  | 29.25                        | 32.00                   | 32.00                 |
| <i>Rhizosolenia setigera</i> | 11.96                        | 13.08                   | 45.08                 |
| <i>Cyclostephanos</i> sp.    | 9.31                         | 10.18                   | 55.26                 |
| <i>Katodinium glaucum</i>    | 7.448                        | 8.15                    | 63.41                 |
| <i>Alexandrium</i> sp.       | 7.147                        | 7.82                    | 71.23                 |
| <b>Lafra - Vis2</b>          |                              |                         |                       |
| <i>Prorocentrum minimum</i>  | 20.55                        | 22.85                   | 22.85                 |
| <i>Cyclostephanos</i> sp.    | 14.45                        | 16.06                   | 38.91                 |
| <i>Alexandrium</i> sp.       | 11.13                        | 12.38                   | 51.29                 |
| <i>Katodinium glaucum</i>    | 6.62                         | 7.36                    | 58.65                 |
| Coccoid cyanobacteria        | 5.47                         | 6.09                    | 64.73                 |
| <i>Eutreptiella</i> sp.      | 3.73                         | 4.15                    | 68.88                 |
| <i>Gonyaulax verior</i>      | 3.67                         | 4.08                    | 72.95                 |
| <b>Lafra - Vis3</b>          |                              |                         |                       |
| <i>Prorocentrum minimum</i>  | 22.60                        | 24.81                   | 24.81                 |
| <i>Alexandrium</i> sp.       | 10.57                        | 11.60                   | 36.41                 |
| <i>Cyclostephanos</i> sp.    | 10.34                        | 11.35                   | 47.76                 |
| <i>Rhizosolenia setigera</i> | 7.36                         | 8.08                    | 55.83                 |
| <i>Katodinium glaucum</i>    | 6.75                         | 7.41                    | 63.24                 |
| Coccoid cyanobacteria        | 3.78                         | 4.15                    | 67.39                 |
| <i>Chaetoceros</i> sp.       | 3.57                         | 3.92                    | 71.31                 |

**b. Lafrouda - Vistonis lagoons.**

| <b>Taxon</b>                 | <b>Average dissimilarity</b> | <b>Contribution (%)</b> | <b>Cumulative (%)</b> |
|------------------------------|------------------------------|-------------------------|-----------------------|
| <b>Lafrouda - Vis1</b>       |                              |                         |                       |
| <i>Prorocentrum minimum</i>  | 35.01                        | 38.05                   | 38.05                 |
| <i>Rhizosolenia setigera</i> | 11.90                        | 12.94                   | 50.99                 |
| <i>Cyclostephanos</i> sp.    | 9.85                         | 10.71                   | 61.70                 |
| <i>Alexandrium</i> sp.       | 7.13                         | 7.75                    | 69.44                 |
| <i>Katodinium glaucum</i>    | 6.67                         | 7.25                    | 76.69                 |
| Coccoid cyanobacteria        | 4.12                         | 4.48                    | 81.17                 |
| <b>Lafrouda - Vis2</b>       |                              |                         |                       |
| <i>Prorocentrum minimum</i>  | 28.05                        | 30.19                   | 30.19                 |
| <i>Cyclostephanos</i> sp.    | 15.03                        | 16.17                   | 46.36                 |
| <i>Alexandrium</i> sp.       | 10.69                        | 11.51                   | 57.87                 |
| <i>Katodinium glaucum</i>    | 5.63                         | 6.06                    | 63.93                 |
| Coccoid cyanobacteria        | 4.61                         | 4.96                    | 68.89                 |
| <i>Rhizosolenia setigera</i> | 3.95                         | 4.25                    | 73.14                 |

|                              |       |       |       |
|------------------------------|-------|-------|-------|
| <b>Lafrouda - Vis3</b>       |       |       |       |
| <i>Prorocentrum</i>          | 28.56 | 30.90 | 30.90 |
| <i>minimum</i>               |       |       |       |
| <i>Alexandrium</i> sp.       | 10.86 | 11.75 | 42.65 |
| <i>Cyclostephanos</i> sp.    | 10.85 | 11.73 | 54.38 |
| <i>Rhizosolenia setigera</i> | 7.55  | 8.17  | 62.55 |
| <i>Katodinium glaucum</i>    | 6.01  | 6.50  | 69.05 |
| <i>Chaetoceros</i> sp.       | 4.83  | 5.21  | 74.27 |

c. Lagos - Vistonis lagoons.

| <b>Taxon</b>                           | <b>Average dissimilarity</b> | <b>Contribution (%)</b> | <b>Cumulative (%)</b> |
|----------------------------------------|------------------------------|-------------------------|-----------------------|
| <b>Lag - Vis1</b>                      |                              |                         |                       |
| <i>Alexandrium</i> sp.                 | 11.69                        | 13.33                   | 13.33                 |
| <i>Prorocentrum minimum</i>            | 10.15                        | 11.57                   | 24.91                 |
| <i>Katodinium glaucum</i>              | 5.87                         | 6.69                    | 31.60                 |
| <i>Prorocentrum micans</i>             | 5.66                         | 6.46                    | 38.05                 |
| Coccoid cyanobacteria                  | 5.19                         | 5.92                    | 43.98                 |
| <i>Cylindrotheca closterium</i>        | 4.98                         | 5.68                    | 49.65                 |
| <i>Gonyaulax fragilis</i>              | 4.52                         | 5.15                    | 54.81                 |
| <i>Teleaulax acuta</i>                 | 3.77                         | 4.30                    | 59.10                 |
| <i>Skeletonema</i> cf. <i>costatum</i> | 3.64                         | 4.15                    | 63.26                 |
| <i>Gonyaulax verior</i>                | 3.49                         | 3.98                    | 67.23                 |
| <i>Heterosigma</i> sp.                 | 3.23                         | 3.67                    | 70.92                 |
| <b>Lag - Vis2</b>                      |                              |                         |                       |
| <i>Prorocentrum minimum</i>            | 19.57                        | 21.92                   | 21.92                 |
| <i>Cyclostephanos</i> sp.              | 16.28                        | 18.24                   | 40.16                 |
| <i>Katodinium glaucum</i>              | 8.22                         | 9.20                    | 49.36                 |
| <i>Alexandrium</i> sp.                 | 6.79                         | 7.61                    | 56.97                 |
| Coccoid cyanobacteria                  | 5.56                         | 6.23                    | 63.20                 |
| <i>Rhizosolenia setigera</i>           | 3.59                         | 4.03                    | 67.23                 |
| <i>Prorocentrum micans</i>             | 3.47                         | 3.82                    | 71.11                 |
| <b>Lag - Vis3</b>                      |                              |                         |                       |
| <i>Prorocentrum minimum</i>            | 22.39                        | 24.59                   | 24.59                 |
| <i>Cyclostephanos</i> sp.              | 11.91                        | 13.09                   | 37.68                 |
| <i>Katodinium glaucum</i>              | 8.27                         | 9.09                    | 46.77                 |
| <i>Rhizosolenia setigera</i>           | 7.71                         | 8.47                    | 55.24                 |
| <i>Alexandrium</i> sp.                 | 6.49                         | 7.13                    | 62.37                 |
| <i>Chaetoceros</i> sp.                 | 4.00                         | 4.40                    | 66.77                 |
| Coccoid cyanobacteria                  | 3.63                         | 3.99                    | 70.76                 |

d. Palaia Koiti - Vistonis lagoons.

| Taxon                                 | Average<br>dissimilarity | Contribution (%) | Cumulative (%) |
|---------------------------------------|--------------------------|------------------|----------------|
| <b>PK - Vis1</b>                      |                          |                  |                |
| <i>Prorocentrum</i><br><i>minimum</i> | 33.85                    | 35.08            | 35.08          |
| <i>Rizosolenia setigera</i>           | 14.17                    | 14.69            | 49.77          |
| <i>Cyclostephanos</i> sp.             | 12.82                    | 13.28            | 63.05          |
| <i>Katodinium glaucum</i>             | 8.45                     | 8.76             | 71.81          |
| <b>PK - Vis2</b>                      |                          |                  |                |
| <i>Prorocentrum</i><br><i>minimum</i> | 20.78                    | 22.03            | 22.03          |
| <i>Cyclostephanos</i> sp.             | 19.42                    | 20.58            | 42.61          |
| <i>Katodinium glaucum</i>             | 7.66                     | 8.11             | 50.72          |
| Cocoid<br>cyanobacteria               | 6.15                     | 6.52             | 57.25          |
| <i>Rhizosolenia setigera</i>          | 5.98                     | 6.33             | 63.58          |
| <i>Alexandrium</i> sp.                | 5.65                     | 5.99             | 69.57          |
| <i>Gonyaulax fragilis</i>             | 2.97                     | 3.15             | 72.72          |
| <b>PK - Vis3</b>                      |                          |                  |                |
| <i>Prorocentrum</i><br><i>minimum</i> | 23.33                    | 24.57            | 24.57          |
| <i>Cyclostephanos</i> sp.             | 14.18                    | 14.93            | 39.50          |
| <i>Rhizosolenia setigera</i>          | 9.02                     | 9.50             | 49.00          |
| <i>Katodinium glaucum</i>             | 7.70                     | 8.11             | 57.11          |
| <i>Alexandrium</i> sp.                | 6.05                     | 6.37             | 63.48          |
| <i>Chaetoceros</i> sp.                | 4.83                     | 5.09             | 68.57          |
| Cocoid<br>cyanobacteria               | 3.71                     | 3.91             | 72.47          |

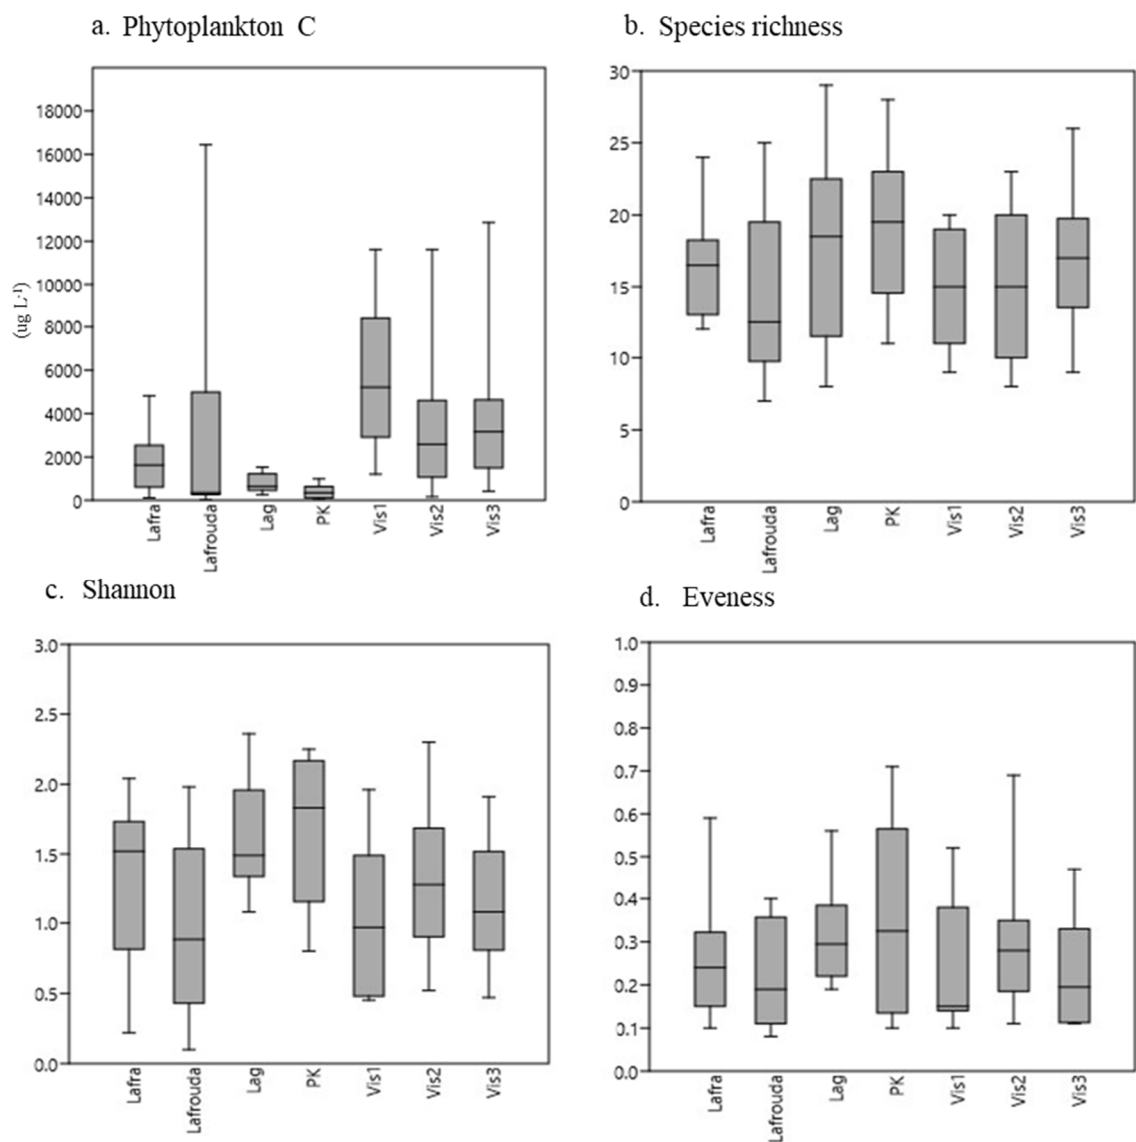

**Supplementary Figure S1: Boxplots of phytoplankton C (a), species richness (b), Shannon index (c) and Evenness (d) in Lafra, Lafrouda, Lagos (Lag), Palaia Koiti (PK) and Vistonis (Vis1, Vis2, Vis3) lagoons.**

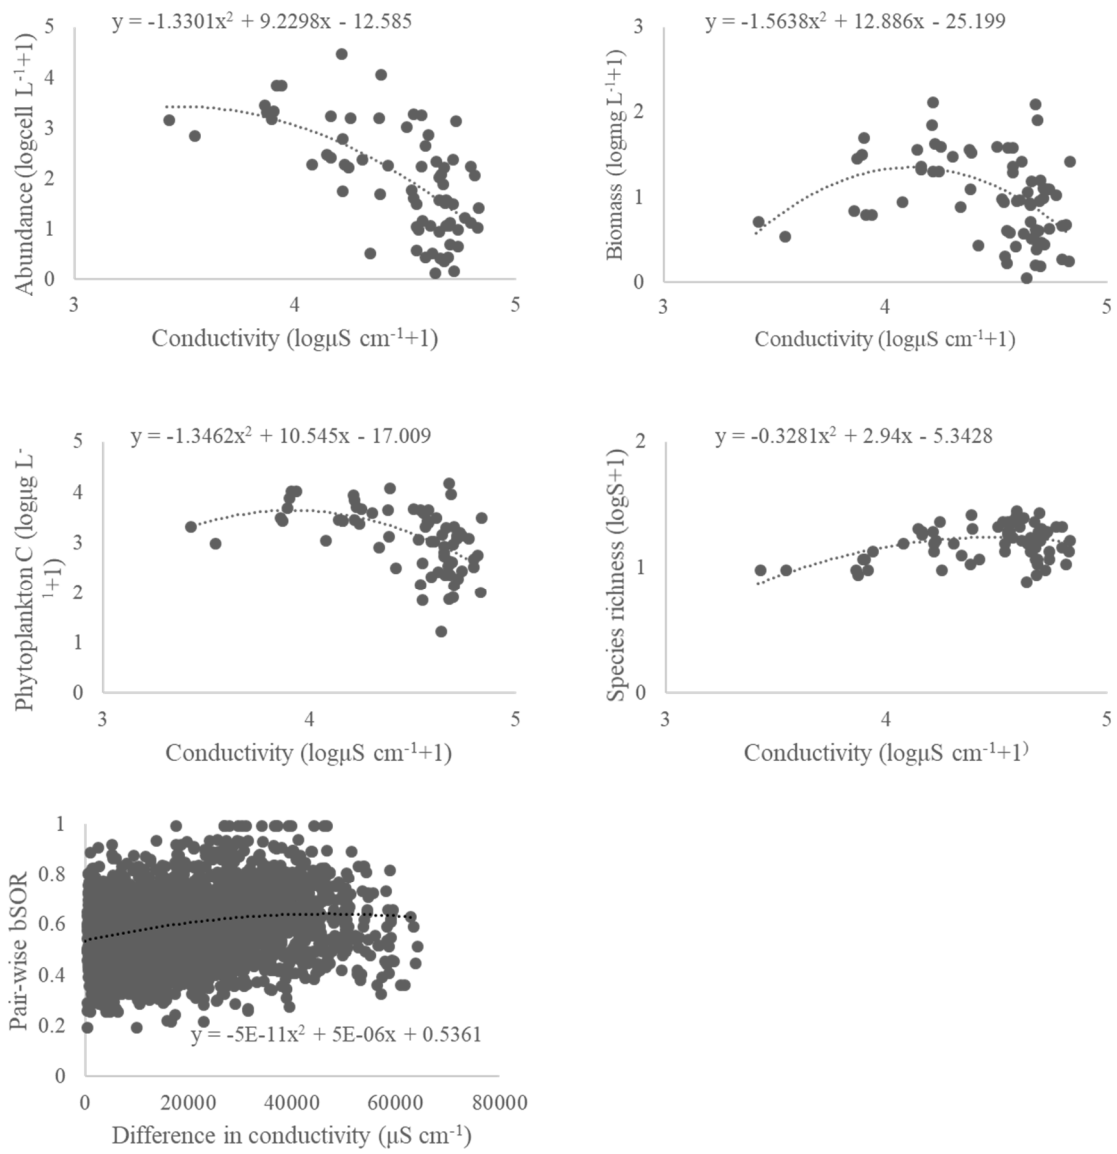

**Supplementary Figure S2:** Scatter plots of conductivity and the different phytoplankton metrics.
